# Supplementary material for: Intraislet glucagon signaling is critical for maintaining glucose homeostasis
Source: JCI journal article supplement (doi:10.1172/jci.insight.127994), 2019-04-23
Supplement: sd1 [file 1]

## **Supplemental Data**

# **Intra-islet Glucagon Signaling is Critical for Maintaining Glucose Homeostasis**

Lu Zhu, Diptadip Dattaroy, Jonathan Pham, Lingdi Wang, Luiz F. Barella, Yinghong Cui, Kenneth J. Wilkins, Bryan L. Roth, Ute Hochgeschwender, Franz M. Matschinsky, Klaus H. Kaestner, Nicolai M. Doliba, and Jürgen Wess

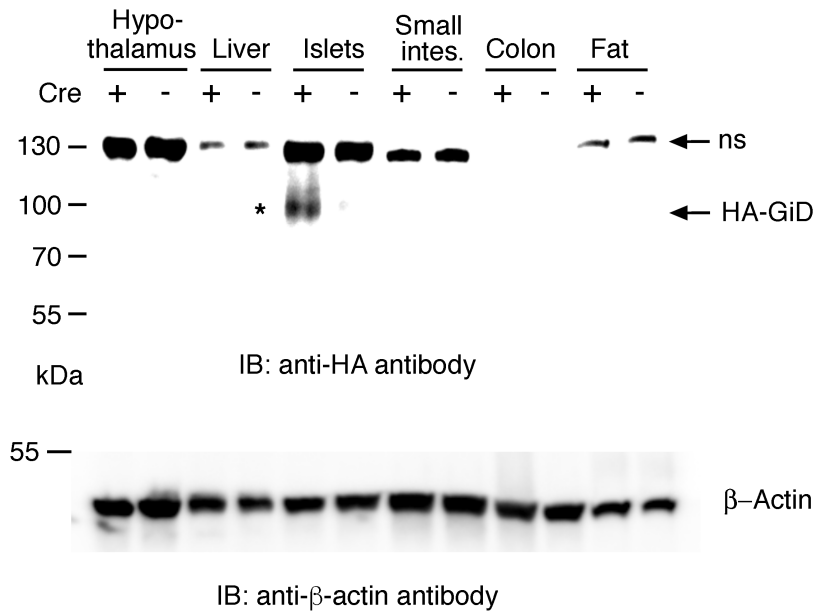

**Supplemental Fig. 1. Selective expression of GiD in pancreatic islets of  $\alpha$ -GiD mice, as detected by western blotting.** Western blotting studies were carried out using lysates from the indicated tissues of  $\alpha$ -GiD transgenic mice and control littermates lacking the Cre transgene (see Supplemental Methods for details). Blots were probed with an anti-HA antibody directed against the HA-epitope tag fused to the N-terminus of GiD. Note that the GiD receptor could be detected as a ~90 kDa band (\*) only in pancreatic islets from  $\alpha$ -GiD mice (Cre+). A ~130 kDa non-specific (ns) band was observed in most lanes. A representative blot is shown. Two additional blots gave similar results. Tissues were harvested from adult male mice four weeks after the last tamoxifen injection. Fat, white adipose epididymal fat.

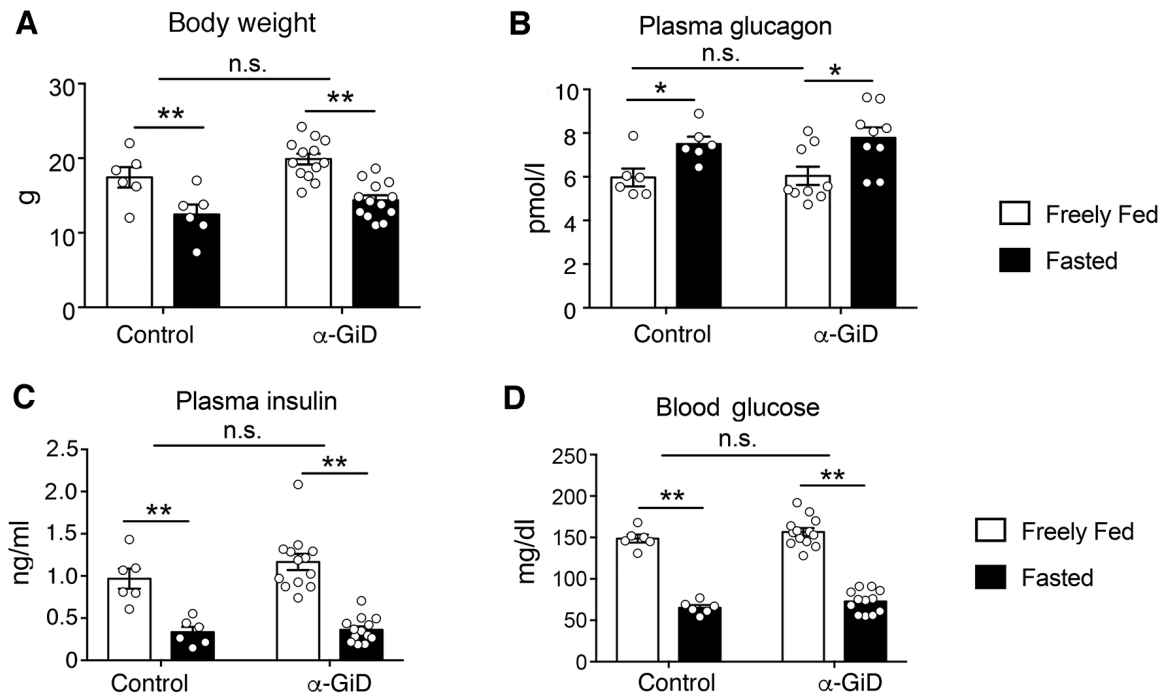

**Supplemental Fig. 2. Body weight, plasma glucagon, plasma insulin, and blood glucose levels in freely fed and fasted  $\alpha$ -GiD and control mice.** Male  $\alpha$ -GiD mice and control littermates (age: 14 weeks) had free access to food (fed mice) or were fasted overnight for 12 hr. (A) Body weight. (B) Plasma glucagon levels. (C) Plasma insulin levels. (D) Blood glucose levels. Data are given as means  $\pm$  SEM (control: n=6;  $\alpha$ -GiD: n=13;). \* $P$ <0.05; \*\* $P$ <0.01 (two-way ANOVA followed by Tukey's post-hoc test). n.s., no statistically significant difference between control and mutant mice.

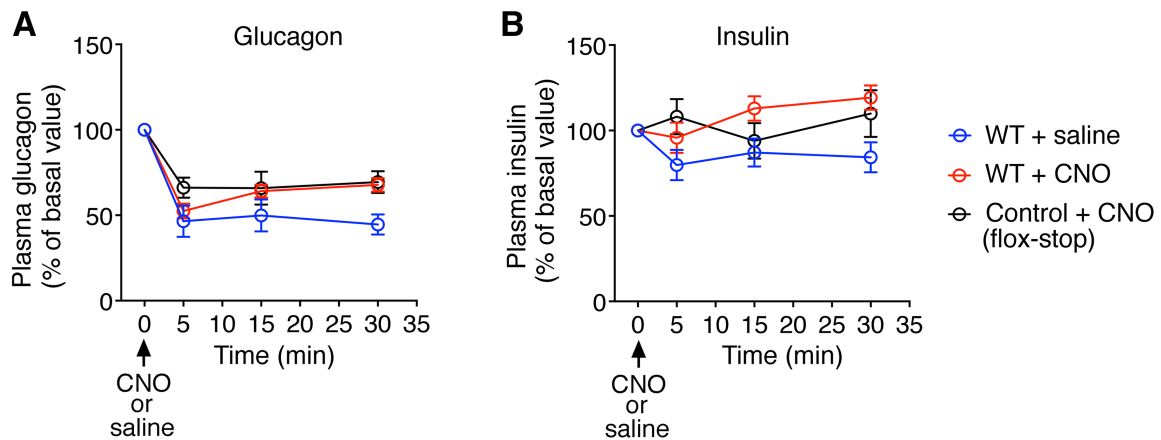

**Supplemental Fig. 3. Saline or CNO injections (i.p.) of fasted wild-type (WT) mice cause reduced plasma glucagon levels.** WT mice (14-week-old males) were injected i.p. with CNO (1 mg/kg) or normal saline, followed by the measurement of plasma glucagon and insulin levels at the indicated time points. For comparison, the data obtained with CNO-treated flox-stop control mice (14-week-old males; see Fig. 1) were also included in the two panels. **(A)** Plasma glucagon levels (% of pre-injection levels). **(B)** Plasma insulin levels (% of pre-injection levels). Data are given as means  $\pm$  SEM (n=6-8 per group).

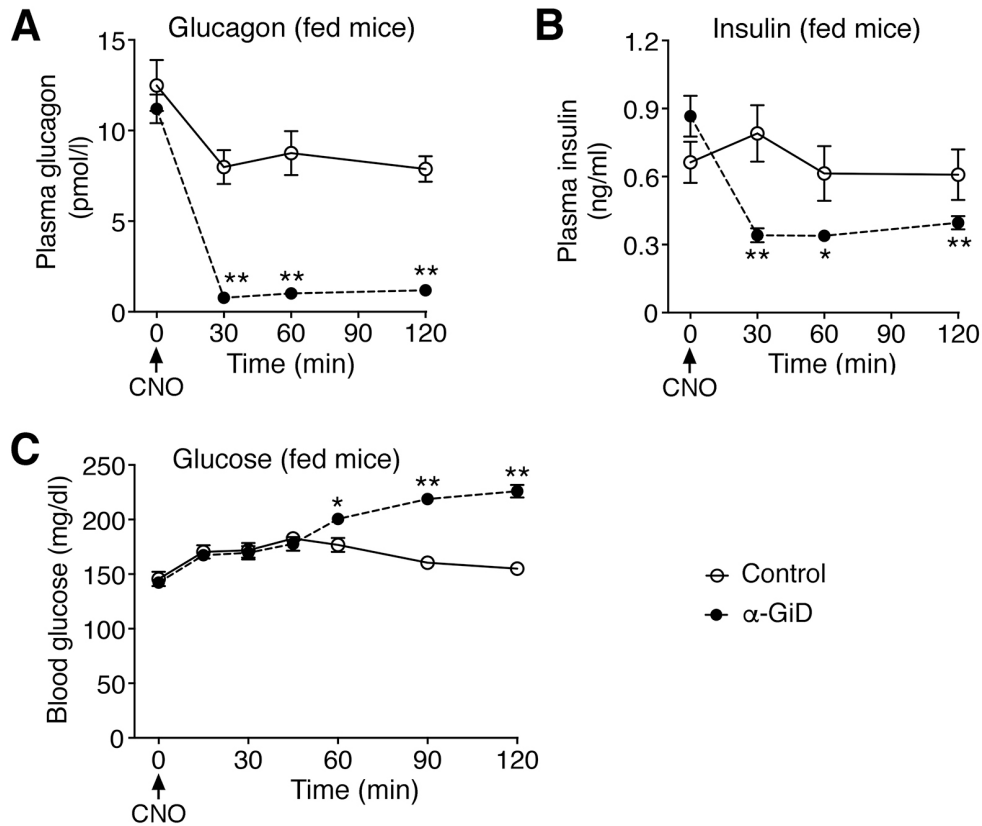

**Supplemental Fig. 4. CNO treatment of  $\alpha$ -GiD mice causes long-lasting reductions in plasma glucagon and insulin levels.** Male  $\alpha$ -GiD mice and control littermates (age: 12-20 weeks) were injected with CNO (1 mg/kg i.p.), followed by the measurement of plasma glucagon, plasma insulin, and blood glucose levels at the indicated time points. Mice had free access to food. **(A)** Plasma glucagon levels after CNO injection. **(B)** Plasma insulin levels after CNO injection. **(C)** Blood glucose levels after CNO injection. Data are given as means  $\pm$  SEM  $\alpha$ -GiD: n=13; control: n=6). \* $P$ <0.05; \*\* $P$ <0.01 (mixed-effects repeated measures ANOVA for post-injection differences).

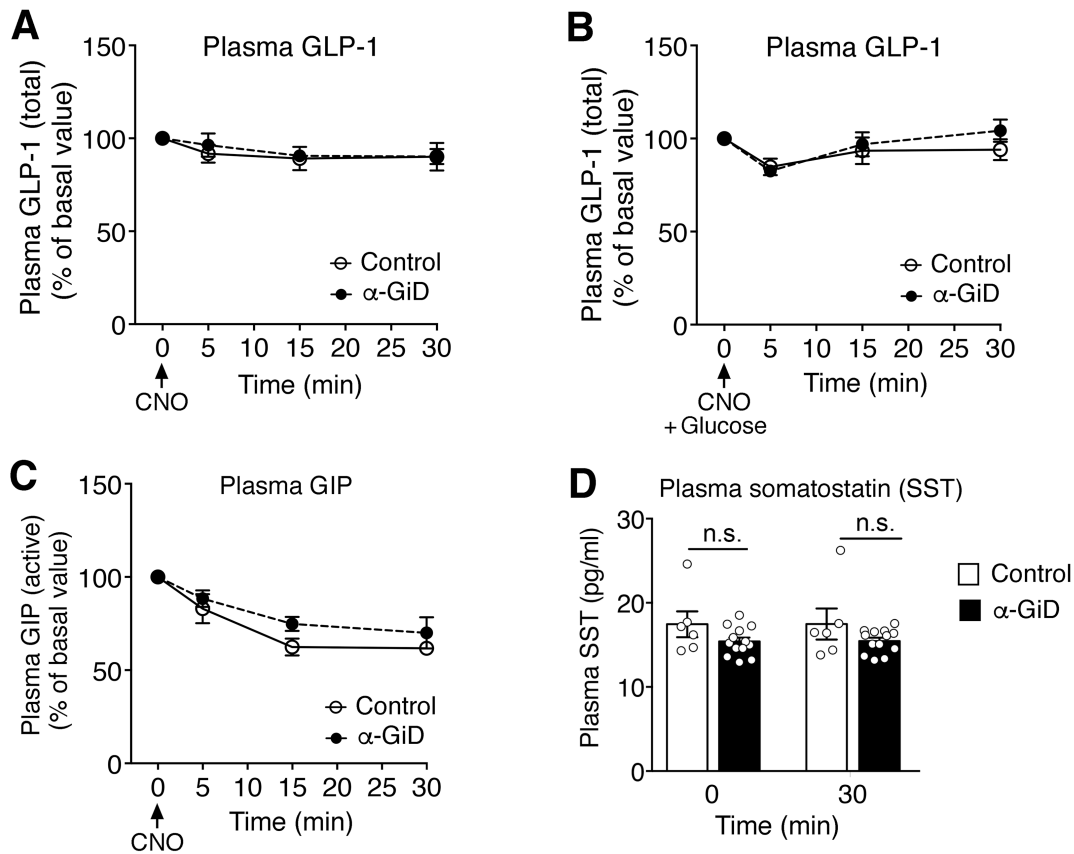

**Supplemental Fig. 5. Plasma GLP-1, GIP and somatostatin (SST) levels after CNO Treatment of  $\alpha$ -GiD mice.** Male  $\alpha$ -GiD mice and control littermates (age: 20-30 weeks) were injected with CNO (1 mg/kg i.p.), followed by the measurement of plasma hormone levels at the indicated time points. Mice had free access to food, except for panel (B) where fasted mice were used. (A) Plasma GLP-1 levels after CNO injection. (B) Plasma GLP-1 levels after coinjection of CNO with glucose (2 g/kg i.p.). (C) Plasma GIP levels after CNO injection. (D) Plasma SST levels determined 30 min after CNO injection. Data in (A-C) were normalized to basal (pre-injection) levels. All experiments were carried out with male littermates that were 20-30 weeks old. Data are given as means  $\pm$  SEM ( $\alpha$ -GiD: n=13; control: n=6). n.s., no statistically significant difference.

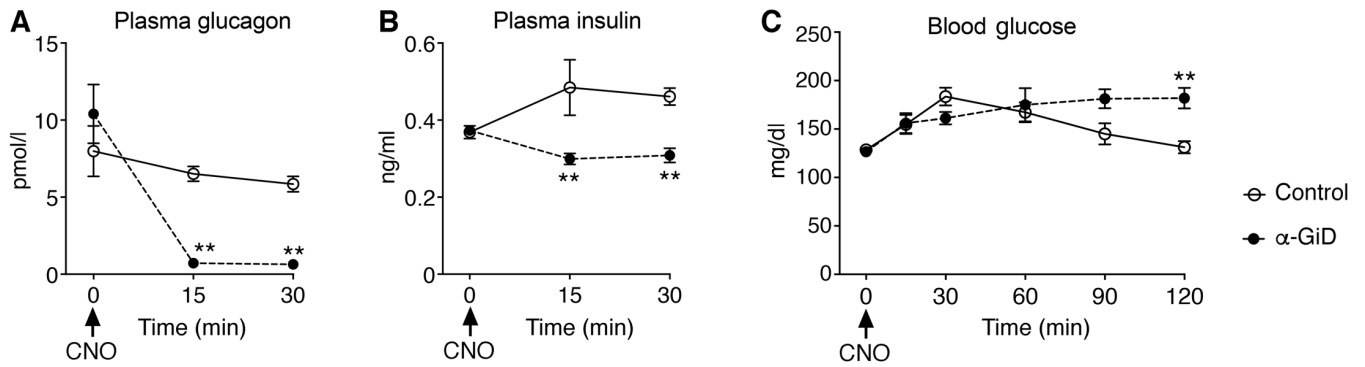

**Supplemental Fig. 6. CNO treatment of female  $\alpha$ -GiD mice causes similar reductions in plasma glucagon and insulin levels as observed with male  $\alpha$ -GiD mice.**

Female  $\alpha$ -GiD mice and control littermates (age: 12 weeks) were injected with CNO (1 mg/kg i.p.), followed by the measurement of plasma glucagon, plasma insulin, and blood glucose levels at the indicated time points. Mice had free access to food. (A) Plasma glucagon levels. (B) Plasma insulin levels. (C) Blood glucose levels. Data are given as means  $\pm$  SEM ( $\alpha$ -GiD: n=7; control: n=5). \* $P$ <0.05; \*\* $P$ <0.01 (mixed-effects repeated measures ANOVA for post-injection differences).

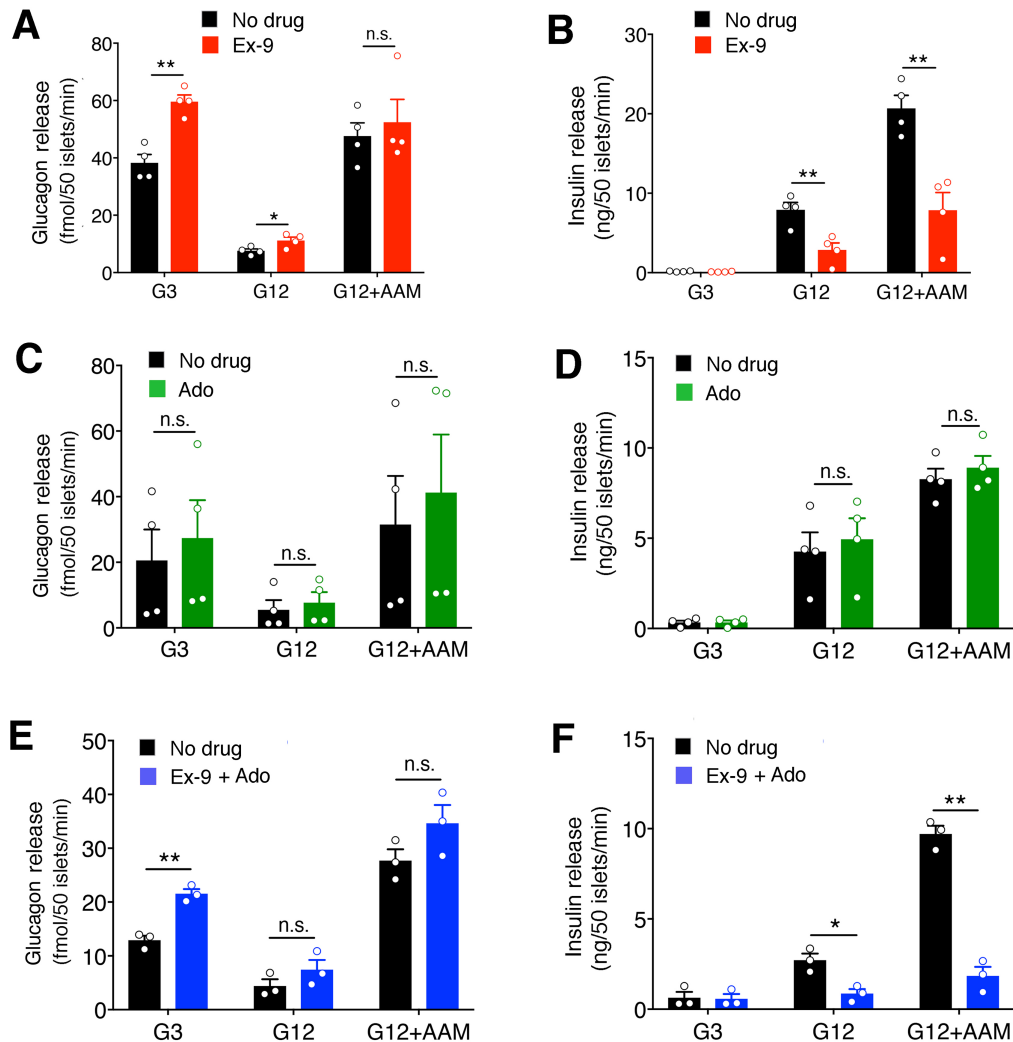

**Supplemental Fig. 7. Quantitative analysis of the glucagon and insulin release data shown in Fig. 4.** Wild-type (WT) mouse pancreatic islets were perfused with 3 or 12 mM of glucose (G3 and G12, respectively) and an amino acid mixture (AAM). Hormone (glucagon and insulin) secretion during a specific time interval was expressed as the average of all values measured during this particular perfusion period: G3, 0-20 min; G12, 20-40 min; G12+AAM: 40-60 min. **(A, B)** Glucagon (A) and insulin (B) secretion in the presence or absence of Ex9 (1  $\mu$ M), a selective GLP-1 receptor antagonist. **(C, D)** Glucagon (C) and insulin (D) secretion in the presence or absence of adomeglivant (Ado; 1  $\mu$ M), a selective glucagon receptor antagonist. **(E, F)** Glucagon (E) and insulin (F) secretion in the presence or absence of a mixture of Ex9 (1  $\mu$ M) and Ado (1  $\mu$ M). The amounts of secreted glucagon and insulin were normalized to islet DNA content. All islets were prepared from 12-20-week-old male mice. Data are presented as means  $\pm$  SEM (three or four perfusions with 50 islets per perfusion chamber; islets from two mice were pooled per perfusion experiment). \* $P$ <0.05; \*\* $P$ <0.01 (two-tailed Student's t-test). n.s., no statistically significant difference.



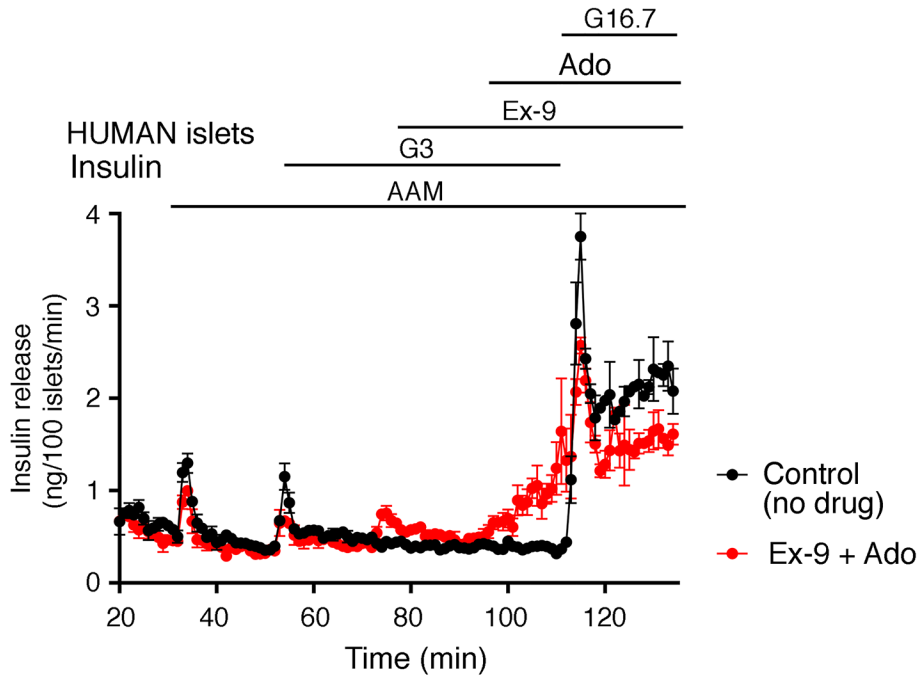

**Supplemental Fig. 8. Insulin release studies performed with perfused human islets in the presence of Ex-9 and adomeglivant.** Human islets were perfused with 3 and 16.7 mM of glucose (G3 and G16.7, respectively), in the presence of a physiological amino acid mixture (AAM). Insulin secretion was monitored continuously throughout experiments. A mixture of 1  $\mu$ M Ex-9 (selective GLP-1 receptor antagonist) and 1  $\mu$ M adomeglivant (Ado; selective glucagon receptor antagonist) was added prior to stimulation of islets with G16.7. In the control group, both drugs were omitted from the perfusate. Data represent means  $\pm$  SEM from two independent perfusions.

**Supplemental Table S1. Source of Reagents and Animals**

| <b>Reagent/resource</b>                               | <b>Source</b>                                      |                       |
|-------------------------------------------------------|----------------------------------------------------|-----------------------|
| <b>Antibodies</b>                                     |                                                    |                       |
| Rabbit anti-HA antibody                               | Cell Signaling                                     | Cat# 3724             |
| Guinea pig anti-insulin antibody                      | Abcam                                              | Cat# 7842             |
| Mouse anti-glucagon                                   | Sigma-Aldrich                                      | Cat# G2654            |
| Mouse anti- $\beta$ -actin antibody                   | Cell Signaling                                     | Cat# 3700             |
| Anti-rabbit IgG, HRP-linked secondary antibody        | Cell Signaling                                     | Cat# 7074             |
| Anti-mouse IgG, HRP-linked secondary antibody         | Cell Signaling                                     | Cat# 7076             |
| Alexa Fluor 555 goat anti-guinea secondary antibody   | Thermo Fisher Scientific                           | Cat# A21435           |
| Alexa Fluor 555 goat anti-mouse secondary antibody    | Thermo Fisher Scientific                           | Cat# A28180           |
| Alexa Fluor 488 goat anti-rabbit secondary antibody   | Thermo Fisher Scientific                           | Cat# A11034           |
| <b>Drugs, etc.</b>                                    |                                                    |                       |
| Clozapine-N-oxide (CNO)                               | Rapid Access to Investigative Drug Program (NINDS) | N/A                   |
| Exendin (9-39) amide                                  | Abcam                                              | Cat# ab141101         |
| Adomeglivant                                          | ChemScene                                          | Cat# CS-5729          |
| Tamoxifen                                             | Sigma-Aldrich                                      | Cat# T5648            |
| Aprotinin                                             | Sigma-Aldrich                                      | Cat# A3428            |
| DPP-4 inhibitor (KR-62436 hydrate)                    | Sigma-Aldrich                                      | Cat# K4264            |
| Corn oil                                              | Sigma-Aldrich                                      | Cat# C8267            |
| Human insulin (Humulin R U-100)                       | Eli Lilly                                          | Cat# NDC 0002-8215-17 |
| ProLong <sup>TM</sup> Gold antifade reagent with DAPI | Thermo Fisher Scientific                           | Cat# P36931           |
| BCA protein assay kit                                 | Pierce                                             | Cat# 23225            |
| ECL Western blotting substrate                        | Pierce                                             | Cat# 32106            |

|                                         |                                                             |                 |
|-----------------------------------------|-------------------------------------------------------------|-----------------|
| Bovine serum albumin (fatty acid-free)  | Sigma-Aldrich                                               | Cat# A7030      |
| Triton X-100                            | Fisher Scientific                                           | Cat# BP151      |
| <b>Assay kits</b>                       |                                                             |                 |
| Glucagon ELISA kit                      | Mercodia                                                    | Cat# 10-1281-01 |
| Ultra-Sensitive Mouse Insulin ELISA kit | Crystal Chem                                                | Cat# 90080      |
| Somatostatin ELISA kit                  | LifeSpan Biosciences                                        | Cat# LS-F4026   |
| GLP-1 ELISA kit                         | Crystal Chem                                                | Cat# 81508      |
| GIP ELISA kit                           | Crystal Chem                                                | Cat# 81511      |
| <b>Mouse strains</b>                    |                                                             |                 |
| <i>Gcg-CreER<sup>T2</sup></i> mice      | Dr. Klaus H. Kaestner<br>(University of Pennsylvania)(1)    | N/A             |
| <i>Rosa26-LSL- hM4Di</i> mice           | Dr. Ute Hochgeschwender<br>(Central Michigan University)(2) | N/A             |

## References

1. Ackermann AM, Zhang J, Heller A, Briker A, and Kaestner KH. High-fidelity Glucagon-CreER mouse line generated by CRISPR-Cas9 assisted gene targeting. *Mol Metab.* 2017;6(3):236-44.
2. Zhu H, Aryal DK, Olsen RH, Urban DJ, Swearingen A, Forbes S, et al. Cre-dependent DREADD (Designer Receptors Exclusively Activated by Designer Drugs) mice. *Genesis (New York, NY : 2000).* 2016;54(8):439-46.
